# Supplementary material
Source: HighWire-hosted journal article supplement (https://erj.ersjournals.com/content/55/3/1901785)
Supplement: inline-supplementary-material-1 [file inline-supplementary-material-1.pdf]

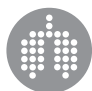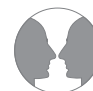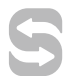

SHAREABLE PDF

# Upregulation of smooth muscle Rho-kinase protein expression in human asthma

Lu Wang <sup>1,2</sup>, Pasquale Chitano<sup>2,3</sup>, Peter D. Paré<sup>1,2</sup> and Chun Y. Seow<sup>2,3</sup>

**Affiliations:** <sup>1</sup>Respiratory Division, Dept of Medicine, University of British Columbia, Vancouver, BC, Canada.

<sup>2</sup>Centre for Heart Lung Innovation, St. Paul's Hospital, University of British Columbia, Vancouver, BC, Canada.

<sup>3</sup>Dept of Pathology and Laboratory Medicine, University of British Columbia, Vancouver, BC, Canada.

**Correspondence:** Lu Wang, UBC Centre for Heart Lung Innovation, St. Paul's Hospital, 1081 Burrard Street, Rm 166, Vancouver, BC, Canada, V6Z 1Y6. E-mail: lu.wang@hli.ubc.ca

 @ERSpublications

**An important phenotypic change is associated with human asthma: the protein expression of both isoforms of Rho-kinase, ROCK1 and ROCK2, is increased in the smooth muscles of intra-parenchymal airways and in the pulmonary blood vessels** <http://bit.ly/2pPfyxH>

**Cite this article as:** Wang L, Chitano P, Paré PD, *et al.* Upregulation of smooth muscle Rho-kinase protein expression in human asthma. *Eur Respir J* 2020; 55: 1901785 [<https://doi.org/10.1183/13993003.01785-2019>].

This single-page version can be shared freely online.

## *To the Editor:*

The lack of bronchodilatory response to deep inspiration in asthmatics is thought to be partially due to reduced airway distensibility [1, 2], possibly caused by an increase in airway smooth muscle (ASM) tone and stiffness [3]. Rho-kinase (ROCK) is known to play a role in regulating ASM tone [4] and ASM cytoskeletal stiffness [5].
